# Supplementary material for: Persistent Bacterial and Fungal Community Shifts Exhibited in Selenium-Contaminated Reclaimed Mine Soils
Source: PubMed Central journal article supplement (PMC6070768; doi:10.1128/aem.01394-18), 2018-08-01

## **Supplemental Information**

### **Persistent bacterial and fungal community shifts exhibited in selenium-contaminated reclaimed mine soils**

Carla E. Rosenfeld<sup>1,2</sup>, Bruce R. James<sup>3</sup>, and Cara Santelli<sup>1,2,\*</sup>

<sup>1</sup>Department of Earth Sciences, University of Minnesota – Twin Cities, Minneapolis, MN  
USA

<sup>2</sup>BioTechnology Institute, University of Minnesota – Twin Cities, St. Paul, MN USA

<sup>3</sup>Department of Environmental Science and Technology, University of Maryland, College  
Park, MD USA

\*Corresponding author information: 1479 Gortner Ave, Suite 140, St. Paul, MN 55108;  
[santelli@umn.edu](mailto:santelli@umn.edu); phone: 612-624-9760; fax: 612-625-5780

Table S1: pH, Se concentration, organic C and total N content in soils collected from Champ and Mountain Fuel Mine areas during 2015 and 2016.

| Mine                     | Location  | Year | pH  | Se (mg/kg) | Organic C (g/kg) | N (g/kg) |
|--------------------------|-----------|------|-----|------------|------------------|----------|
| Champ Mine (CM)          | BP1       | 2015 | 8.1 | 16.0       | 19.4             | 1.8      |
|                          |           | 2016 | 8.1 | 61.3       | 73.2             | 7.3      |
|                          | ED1       | 2015 | 7.3 | 5.4        | 34.0             | 2.9      |
|                          |           | 2016 | 6.8 | 6.4        | 26.8             | 3.0      |
|                          | ED2       | 2015 | 7.7 | 4.6        | 31.5             | 2.9      |
|                          |           | 2016 | 7.5 | 4.5        | 33.8             | 3.3      |
|                          | ED3       | 2015 | 6.6 | 64.0       | 55.8             | 7.3      |
|                          |           | 2016 | 7.2 | 50.7       | 43.1             | 6.9      |
|                          | ED4       | 2015 | 7.6 | 56.6       | 41.5             | 4.7      |
|                          |           | 2016 | 7.5 | 69.0       | 33.0             | 5.5      |
|                          | ED5       | 2015 | 7.3 | 9.0        | 26.4             | 2.2      |
|                          |           | 2016 | 8.1 | 77.1       | 66.0             | 5.9      |
|                          | Reference | 2015 | 6.4 | 1.7        | 40.9             | 3.4      |
|                          |           | 2016 | 6.7 | 0.9        | 34.5             | 3.3      |
| Mountain Fuel Mine (MFM) | NPD1      | 2015 | 6.9 | 12.3       | 29.8             | 6.2      |
|                          |           | 2016 | 7.3 | 7.9        | 12.0             | 6.4      |
|                          | NPD2      | 2015 | 7.1 | 7.1        | 15.3             | 1.3      |
|                          |           | 2016 | 7.7 | 5.0        | 9.8              | 1.0      |
|                          | NPD3      | 2015 | 7.9 | 4.9        | 8.5              | 0.5      |
|                          |           | 2016 | 7.5 | 38.3       | 22.8             | 2.9      |
|                          | SD1       | 2015 | 6.5 | 38.9       | 43.3             | 6.9      |
|                          |           | 2016 | 7.0 | 19.0       | 21.7             | 3.7      |
|                          | VD1       | 2015 | 7.5 | 7.3        | 27.0             | 2.0      |
|                          |           | 2016 | 8.0 | 4.5        | 11.8             | 1.1      |
|                          | VD2       | 2015 | 7.7 | 4.3        | 14.8             | 0.9      |
|                          |           | 2016 | 7.5 | 3.3        | 7.5              | 1.4      |
|                          | VD3       | 2015 | 6.8 | 7.2        | 15.0             | 2.2      |
|                          |           | 2016 | 7.8 | 7.6        | 17.8             | 2.3      |
| Reference                | 2015      | 7.1  | 1.7 | 40.7       | 3.2              |          |
|                          | 2016      | 7.2  | 0.8 | 40.2       | 3.6              |          |

Notes:

Data represent averages calculated from duplicate samples collected in each year. White shaded rows show data collected in 2015. Grey shaded rows show data collected in 2016.

Table S2: Results of linear models comparing three  $\alpha$ -diversity metrics (Inverse Simpson, OTU Richness, and Shannon) to various geochemical parameters measured in the soils.

|                 | Inverse Simpson |                               |                    | Richness |                               |          | Shannon |                               |                    |
|-----------------|-----------------|-------------------------------|--------------------|----------|-------------------------------|----------|---------|-------------------------------|--------------------|
|                 | slope           | R <sup>2</sup> <sub>adj</sub> | p-value            | slope    | R <sup>2</sup> <sub>adj</sub> | p-value  | slope   | R <sup>2</sup> <sub>adj</sub> | p-value            |
| <b>Bacteria</b> |                 |                               |                    |          |                               |          |         |                               |                    |
| pH              | -462            | 0.13                          | 0.001              | -66.57   | 0.18                          | 0.00008  | -0.253  | 0.07                          | 0.01               |
| Organic C       | -12.67          | 0.001                         | 0.78               | -3.17    | 0.001                         | 0.57     | -0.018  | 0.001                         | 0.58               |
| N               | -818.76         | 0.06                          | 0.03               | -118.03  | 0.08                          | 0.009    | -0.54   | 0.05                          | 0.03               |
| log(Fe)         | 230.74          | 0.009                         | 0.56               | 6.7      | 0.001                         | 0.89     | 0.062   | 0.001                         | 0.82               |
| log(Mn)         | 322.56          | 0.15                          | 0.0003             | 43.13    | 0.19                          | 0.00006  | 0.21    | 0.13                          | 0.0008             |
| <b>Fungi</b>    |                 |                               |                    |          |                               |          |         |                               |                    |
| pH              | -58.8           | 0.075                         | 0.01               | -57.01   | 0.07                          | 0.01     | -0.23   | 0.06                          | 0.02               |
| Organic C       | -1.67           | 0.001                         | 0.8                | -4.55    | 0.006                         | 0.54     | -0.029  | 0.01                          | 0.35               |
| N               | -125.58         | 0.05                          | 0.03               | -147.29  | 0.08                          | 0.01     | -0.7    | 0.1                           | 0.005              |
| log(Fe)         | 149.2           | 0.06                          | 0.02               | 148.8    | 0.07                          | 0.02     | 0.33    | 0.008                         | 0.22               |
| log(Mn)         | 65.66           | 0.27                          | 2x10 <sup>-6</sup> | 69.39    | 0.3                           | <0.00001 | 0.27    | 0.27                          | 2x10 <sup>-6</sup> |

Notes:

P-values <0.05 are considered statistically significant.

Table S3: Spearman's correlation coefficients ( $R^2$ ) for envfit results comparing geochemical factors with bacterial and fungal OTU ordinations.

|                 | $R^2$ | P     |
|-----------------|-------|-------|
| <b>Bacteria</b> |       |       |
| pH              | 0.52  | 0.001 |
| Fe              | 0.29  | 0.001 |
| Mn              | 0.21  | 0.003 |
| organic C       | 0.11  | 0.03  |
| N               | 0.10  | 0.03  |
| Se              | 0.06  | 0.13  |
| <b>Fungi</b>    |       |       |
| pH              | 0.48  | 0.001 |
| Fe              | 0.27  | 0.001 |
| Mn              | 0.22  | 0.001 |
| organic C       | 0.11  | 0.03  |
| N               | 0.04  | 0.27  |
| Se              | 0.07  | 0.11  |

Notes:

P-values <0.05 are considered statistically significant.

Table S4: Mean relative abundances and associated adjusted p-value from one-way analysis of variance for top bacterial phyla (or class, in the case of proteobacteria) in low and high Se soils.

| Bacteria Phylum*    | Mean Relative Abundance (%) |         | P <sub>adjusted</sub> |
|---------------------|-----------------------------|---------|-----------------------|
|                     | low Se                      | high Se |                       |
| Actinobacteria      | 26.0                        | 28.0    | 0.005                 |
| Bacteroidetes       | 10.8                        | 9.8     | 0.13                  |
| Alphaproteobacteria | 10.7                        | 12.1    | 0.28                  |
| Acidobacteria       | 9.9                         | 9.4     | 0.15                  |
| Chloroflexi         | 8.2                         | 8.4     | 0.34                  |
| Verrucomicrobia     | 6.7                         | 5.7     | 0.12                  |
| Planctomycetes      | 5.8                         | 6.2     | 0.34                  |
| Deltaproteobacteria | 4.4                         | 4.1     | 0.13                  |
| Gemmatimonadetes    | 3.9                         | 5.7     | 0.0002                |
| Betaproteobacteria  | 3.8                         | 3.4     | 0.34                  |
| Firmicutes          | 3.1                         | 0.6     | 0.07                  |
| Gammaproteobacteria | 2.6                         | 2.1     | 0.12                  |

Notes:

Adjusted p-values ( $p_{\text{adjusted}}$ ) <0.05 are considered statistically significant.

\*Remaining bacterial phyla with <1% mean relative abundance of all bacterial sequences were: Aminicenantes, Armatimonadetes, Atribacteria, BJ-169, BRC1, Candidatus Berkelbacteria, Chlamydiae, Chlorobi, Cyanobacteria, Deinococcus-Thermus, Elusimicrobia, FBP, FCPU426, Fibrobacteres, Fusobacteria, GAL15, Gracilibacteria, Hydrogenedentes, Ignavibacteriae, Latescibacteria, Microgenomates, Nitrospirae, Omnitrophica, Parcubacteria, Peregrinibacteria, RBG-1 Zixibacteria, Saccharibacteria, SBR1093, Spirochaetae, SR1 Absconditabacteria, Synergistetes, Tectomicrobia, Tenericutes, TM6 Dependientiae, WS2, and WWE3.

Table S5: Two-way analysis of variance table for most abundant bacterial phyla comparing mined and reference sites and sampling year.

| Bacterial Phylum    | Factor              | P <sub>adjusted</sub> |
|---------------------|---------------------|-----------------------|
| Actinobacteria      | mine history        | 0.12                  |
|                     | year                | 2.02E-32              |
|                     | mine history x year | 0.12                  |
| Alphaproteobacteria | mine history        | 0.002                 |
|                     | year                | 0.38                  |
|                     | mine history x year | 0.73                  |
| Bacteroidetes       | mine history        | 1.31E-11              |
|                     | year                | 4.98E-37              |
|                     | mine history x year | 0.10                  |
| Acidobacteria       | mine history        | 2.87E-05              |
|                     | year                | 0.71                  |
|                     | mine history x year | 0.002                 |
| Chloroflexi         | mine history        | 0.16                  |
|                     | year                | 0.71                  |
|                     | mine history x year | 0.71                  |
| Verrucomicrobia     | mine history        | 3.62E-10              |
|                     | year                | 4.28E-08              |
|                     | mine history x year | 0.12                  |
| Planctomycetes      | mine history        | 4.66E-07              |
|                     | year                | 2.54E-66              |
|                     | mine history x year | 0.67                  |
| Deltaproteobacteria | mine history        | 0.12                  |
|                     | year                | 1.20E-16              |
|                     | mine history x year | 0.71                  |
| Gemmatimonadetes    | mine history        | 0.98                  |
|                     | year                | 0.89                  |
|                     | mine history x year | 0.98                  |
| Betaproteobacteria  | mine history        | 0.002                 |
|                     | year                | 0.16                  |
|                     | mine history x year | 0.75                  |
| Firmicutes          | mine history        | 0.42                  |
|                     | year                | 0.001                 |
|                     | mine history x year | 0.16                  |
| Gammaproteobacteria | mine history        | 0.001                 |
|                     | year                | 0.00002               |
|                     | mine history x year | 0.12                  |

Notes:

Mine history factor compared samples collected from mined sites to samples collected from reference (non-mined) sites.

Adjusted p-values <0.05 are considered statistically significant.

Table S6: Mean relative abundances and associated adjusted p-value for OTUs with statistically significant ( $p_{\text{adjusted}} < 0.05$ ) relative abundances in high and low Se soils, as tested using nonparametric Mann-Whitney U test.

| Phylum           | OTU     | Consensus Taxonomy*            | Mean Relative Abundance (%) |         | $p_{\text{adjusted}}$ |
|------------------|---------|--------------------------------|-----------------------------|---------|-----------------------|
|                  |         |                                | low Se                      | high Se |                       |
| Acidobacteria    | OTU 39  | family Blastocatellaceae       | 0.50                        | 0.05    | 0.003                 |
| Acidobacteria    | OTU 48  | phylum Acidobacteria           | 0.35                        | 0.19    | 0.033                 |
| Acidobacteria    | OTU 58  | phylum Acidobacteria           | 0.31                        | 0.17    | 0.031                 |
| Acidobacteria    | OTU 93  | family Blastocatellaceae       | 0.18                        | 0.02    | 0.001                 |
| Acidobacteria    | OTU 107 | phylum Acidobacteria           | 0.15                        | 0.09    | 0.029                 |
| Acidobacteria    | OTU 155 | family Blastocatellaceae       | 0.13                        | 0.02    | 0.033                 |
| Actinobacteria   | OTU 11  | family Micrococcaceae          | 0.35                        | 0.04    | 0.005                 |
| Actinobacteria   | OTU 55  | family Micromonosporaceae      | 0.24                        | 0.44    | 0.029                 |
| Actinobacteria   | OTU 98  | genus <i>Kribbella</i> sp.     | 0.10                        | 0.20    | 0.029                 |
| Actinobacteria   | OTU 102 | genus <i>Amycolatopsis</i> sp. | 0.10                        | 0.48    | 0.004                 |
| Actinobacteria   | OTU 118 | genus <i>Nocardioides</i> sp.  | 0.13                        | 0.26    | 0.033                 |
| Actinobacteria   | OTU 124 | order Solirubrobacterales      | 0.17                        | 0.04    | 0.031                 |
| Actinobacteria   | OTU 129 | order Solirubrobacterales      | 0.12                        | 0.20    | 0.048                 |
| Actinobacteria   | OTU 168 | genus <i>Nocardioides</i> sp.  | 0.08                        | 0.20    | 0.031                 |
| Actinobacteria   | OTU 172 | genus <i>Lentzea</i> sp.       | 0.08                        | 0.29    | 0.004                 |
| Bacteroidetes    | OTU 110 | genus <i>Segetibacter</i> sp.  | 0.09                        | 0.24    | 0.033                 |
| Chloroflexi      | OTU 41  | phylum Chloroflexi             | 0.45                        | 0.18    | 0.014                 |
| Chloroflexi      | OTU 119 | family Anaerolineaceae         | 0.16                        | 0.06    | 0.012                 |
| Firmicutes       | OTU 14  | order Bacillales               | 1.07                        | 0.27    | 0.014                 |
| Firmicutes       | OTU 23  | family Planococcaceae          | 0.69                        | 0.18    | 0.005                 |
| Firmicutes       | OTU 97  | genus <i>Domibacillus</i> sp.  | 0.27                        | 0.04    | 0.004                 |
| Gemmatimonadetes | OTU 30  | family Gemmatimonadaceae       | 0.33                        | 1.06    | 0.040                 |
| Gemmatimonadetes | OTU 82  | genus <i>Gemmatimonas</i> sp.  | 0.06                        | 0.26    | 0.029                 |
| Verrucomicrobia  | OTU 64  | order Chthoniobacterales       | 0.33                        | 0.01    | 0.040                 |
| Verrucomicrobia  | OTU 288 | order Chthoniobacterales       | 0.14                        | 0.01    | 0.004                 |

Notes:

\*Consensus taxonomy assigned at 80% confidence cutoff.

Table S7: Relative abundances and associated adjusted p-value from one-way analysis of variance for all sequences classified at the fungal phylum level in low and high Se soils.

| Fungal Phylum   | Mean Relative Abundance (%) |         | p <sub>adjusted</sub> |
|-----------------|-----------------------------|---------|-----------------------|
|                 | low Se                      | high Se |                       |
| Ascomycota      | 68.9                        | 69.6    | 0.98                  |
| Basidiomycota   | 11.9                        | 14.5    | 0.95                  |
| Chytridiomycota | 2.8                         | 1.2     | 0.95                  |
| Glomeromycota   | 1.3                         | 1.3     | 0.98                  |
| Rozellomycota   | 0.01                        | 0.05    | 0.77                  |
| Zygomycota      | 5.2                         | 4.3     | 0.95                  |

Notes:

Adjusted p-values <0.05 are considered statistically significant.



Table S8: Two-way analysis of variance table for fungal phyla comparing mined and reference sites and sampling year.

| Fungal Phylum   | Factor              | P <sub>adjusted</sub> |
|-----------------|---------------------|-----------------------|
| Ascomycota      | mine history        | 0.49                  |
|                 | year                | 0.49                  |
|                 | mine history x year | 0.85                  |
| Basidiomycota   | mine history        | 0.72                  |
|                 | year                | 0.49                  |
|                 | mine history x year | 0.85                  |
| Chytridiomycota | mine history        | 0.49                  |
|                 | year                | 0.49                  |
|                 | mine history x year | 0.85                  |
| Glomeromycota   | mine history        | 0.49                  |
|                 | year                | 0.49                  |
|                 | mine history x year | 0.72                  |
| Rozellomycota   | mine history        | 0.49                  |
|                 | year                | 0.85                  |
|                 | mine history x year | 0.85                  |
| Zygomycota      | mine history        | 0.0002                |
|                 | year                | 0.49                  |
|                 | mine history x year | 0.85                  |

Notes:

Mine history factor compared samples collected from mined sites to samples collected from reference (non-mined) sites.

Adjusted p-values <0.05 are considered statistically significant.

Table S9: Two-way analysis of variance table for fungal families in the Ascoymycota phylum, comparing mined and reference sites and sampling year.

| Family                                   | Factor              | P <sub>adjusted</sub> |
|------------------------------------------|---------------------|-----------------------|
| <b>Ascomycota</b>                        |                     |                       |
| Pleosporales ( <i>incertae sedis</i> )   | mine history        | 0.19                  |
|                                          | year                | 0.66                  |
|                                          | mine history x year | 0.94                  |
| Trichocomaceae                           | mine history        | 0.88                  |
|                                          | year                | 0.27                  |
|                                          | mine history x year | 0.95                  |
| Lasiosphaeriaceae                        | mine history        | 0.56                  |
|                                          | year                | 0.77                  |
|                                          | mine history x year | 0.94                  |
| Helotiales ( <i>incertae sedis</i> )     | mine history        | 0.19                  |
|                                          | year                | 0.77                  |
|                                          | mine history x year | 0.36                  |
| Pezizomycotina ( <i>incertae sedis</i> ) | mine history        | 0.38                  |
|                                          | year                | 0.36                  |
|                                          | mine history x year | 0.23                  |
| Sporormiaceae                            | mine history        | 0.38                  |
|                                          | year                | 0.19                  |
|                                          | mine history x year | 0.27                  |
| Mycosphaerellaceae                       | mine history        | 0.38                  |
|                                          | year                | 0.27                  |
|                                          | mine history x year | 0.56                  |
| Nectriaceae                              | mine history        | 0.25                  |
|                                          | year                | 0.25                  |
|                                          | mine history x year | 0.77                  |
| Helotiaceae                              | mine history        | 0.38                  |
|                                          | year                | 0.19                  |
|                                          | mine history x year | 0.77                  |
| Phaeosphaeriaceae                        | mine history        | 0.45                  |
|                                          | year                | 0.27                  |
|                                          | mine history x year | 0.74                  |

Notes:

Mine history factor compared samples collected from mined sites to samples collected from reference (non-mined) sites.

Adjusted p-values <0.05 are considered statistically significant.

Table S10: Two-way analysis of variance table for fungal families in the Basidiomycota phylum, comparing mined and reference sites and sampling year.

| Family                                | Factor              | P <sub>adjusted</sub> |
|---------------------------------------|---------------------|-----------------------|
| <b>Basidiomycota</b>                  |                     |                       |
| Ceratobasidiaceae                     | mine history        | 0.49                  |
|                                       | year                | 0.94                  |
|                                       | mine history x year | 0.94                  |
| Entolomataceae                        | mine history        | 0.65                  |
|                                       | year                | 0.65                  |
|                                       | mine history x year | 0.88                  |
| Tremellales ( <i>incertae sedis</i> ) | mine history        | 0.002                 |
|                                       | year                | 0.88                  |
|                                       | mine history x year | 0.72                  |
| Hydnodontaceae                        | mine history        | 0.85                  |
|                                       | year                | 0.73                  |
|                                       | mine history x year | 0.88                  |
| Bolbitiaceae                          | mine history        | 0.88                  |
|                                       | year                | 0.65                  |
|                                       | mine history x year | 0.88                  |
| Piskurozymaceae                       | mine history        | 0.88                  |
|                                       | year                | 0.88                  |
|                                       | mine history x year | 0.49                  |
| Clavariaceae                          | mine history        | 0.65                  |
|                                       | year                | 0.44                  |
|                                       | mine history x year | 0.88                  |
| Lyophyllaceae                         | mine history        | 0.94                  |
|                                       | year                | 0.88                  |
|                                       | mine history x year | 0.65                  |
| Mycenaceae                            | mine history        | 0.002                 |
|                                       | year                | 0.65                  |
|                                       | mine history x year | 0.44                  |
| Agaricaceae                           | mine history        | 0.76                  |
|                                       | year                | 0.85                  |
|                                       | mine history x year | 0.65                  |

Notes:

Mine history factor compared samples collected from mined sites to samples collected from reference (non-mined) sites.

Adjusted p-values <0.05 are considered statistically significant.

Table S11: Mean relative abundances and associated adjusted p-value for OTUs with statistically significant ( $p_{\text{adjusted}} < 0.05$ ) relative abundances in high and low Se soils, as tested using nonparametric Mann-Whitney U test.

| Phylum          | OTU     | Consensus Taxonomy*                  | Mean Relative Abundance (%) |         | $P_{\text{adjusted}}$ |
|-----------------|---------|--------------------------------------|-----------------------------|---------|-----------------------|
|                 |         |                                      | low Se                      | high Se |                       |
| Chytridiomycota | OTU 7   | genus <i>Olpidium sp.</i>            | 0.57                        | 0.00    | 0.022                 |
| Ascomycota      | OTU 17  | genus <i>Paraboeremia sp.</i>        | 0.74                        | 0.08    | 0.039                 |
| Ascomycota      | OTU 32  | phylum Ascomycota                    | 0.67                        | 0.00    | 0.022                 |
| Ascomycota      | OTU 45  | genus <i>Podospora sp.</i>           | 0.37                        | 0.00    | 0.039                 |
| Ascomycota      | OTU 62  | genus <i>Phaeomyocentrospora sp.</i> | 0.16                        | 0.57    | 0.039                 |
| Ascomycota      | OTU 96  | phylum Ascomycota                    | 0.10                        | 0.46    | 0.039                 |
| Ascomycota      | OTU 97  | genus <i>Chaetomium sp.</i>          | 0.25                        | 0.00    | 0.028                 |
| Ascomycota      | OTU 113 | genus <i>Purpureocillium sp.</i>     | 0.08                        | 0.55    | 0.039                 |
| Ascomycota      | OTU 122 | genus <i>Penicillium sp.</i>         | 0.09                        | 0.29    | 0.039                 |
| Ascomycota      | OTU 136 | genus <i>Humicola sp.</i>            | 0.20                        | 0.00    | 0.046                 |
| Ascomycota      | OTU 176 | genus <i>Paraphoma sp.</i>           | 0.17                        | 0.02    | 0.001                 |
| Ascomycota      | OTU 558 | genus <i>Gorgomyces sp.</i>          | 0.00                        | 0.49    | 0.00002               |

Notes:

\*Consensus taxonomy was assigned with 80% confidence cutoff.

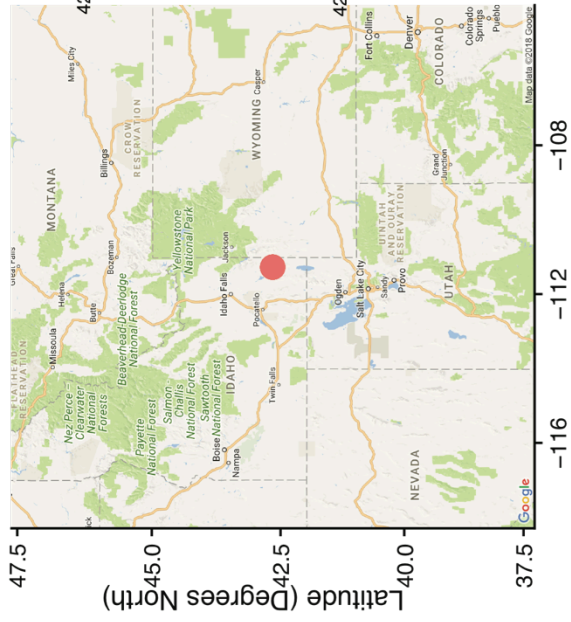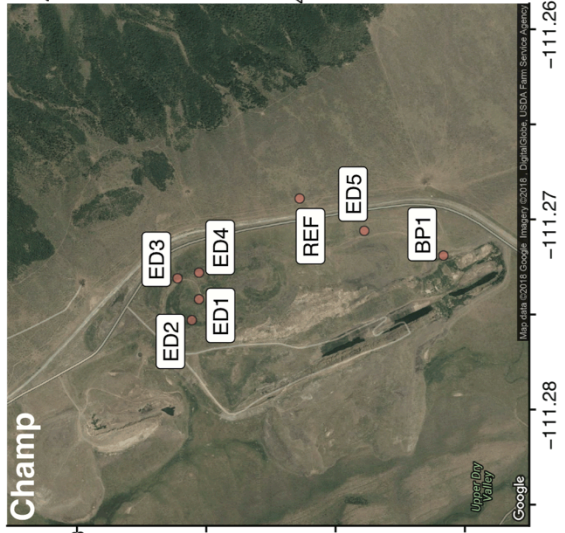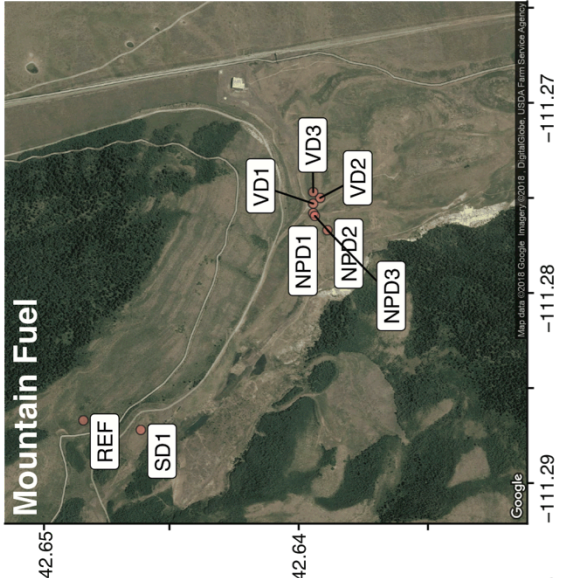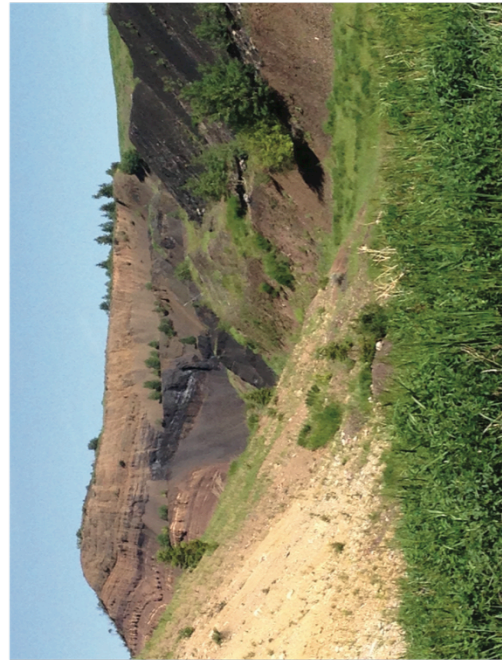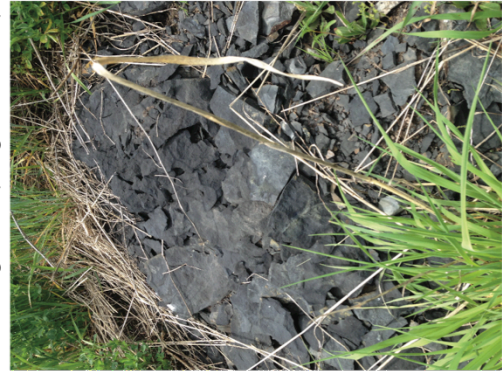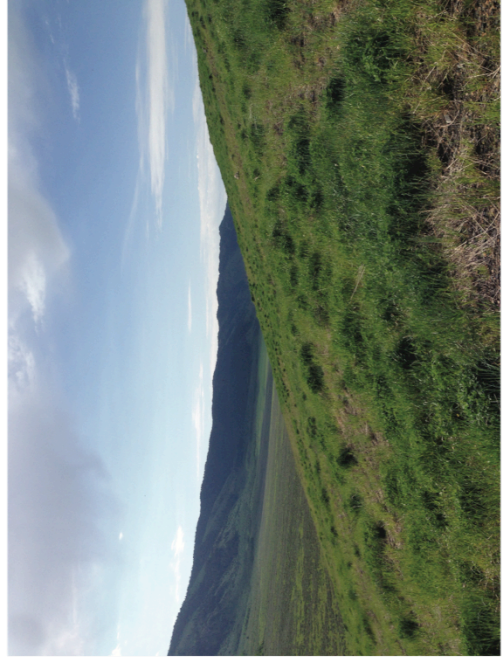

Fig S1: Overview map of the Idaho region (A) with sampling area approximately located at the position of the red dot. Map of sampling locations (red dots) within the Champ Mine (CM; B) and Mountain Fuel Mine (MFM; C). Photo of shale placement on soil surface at location CM-ED4 (D), and photo taken at CM-ED3 depicting typical vegetation density found throughout CM and MFM sites (E). During both years, duplicate samples were collected at each location from separate holes for DNA and geochemical analysis.

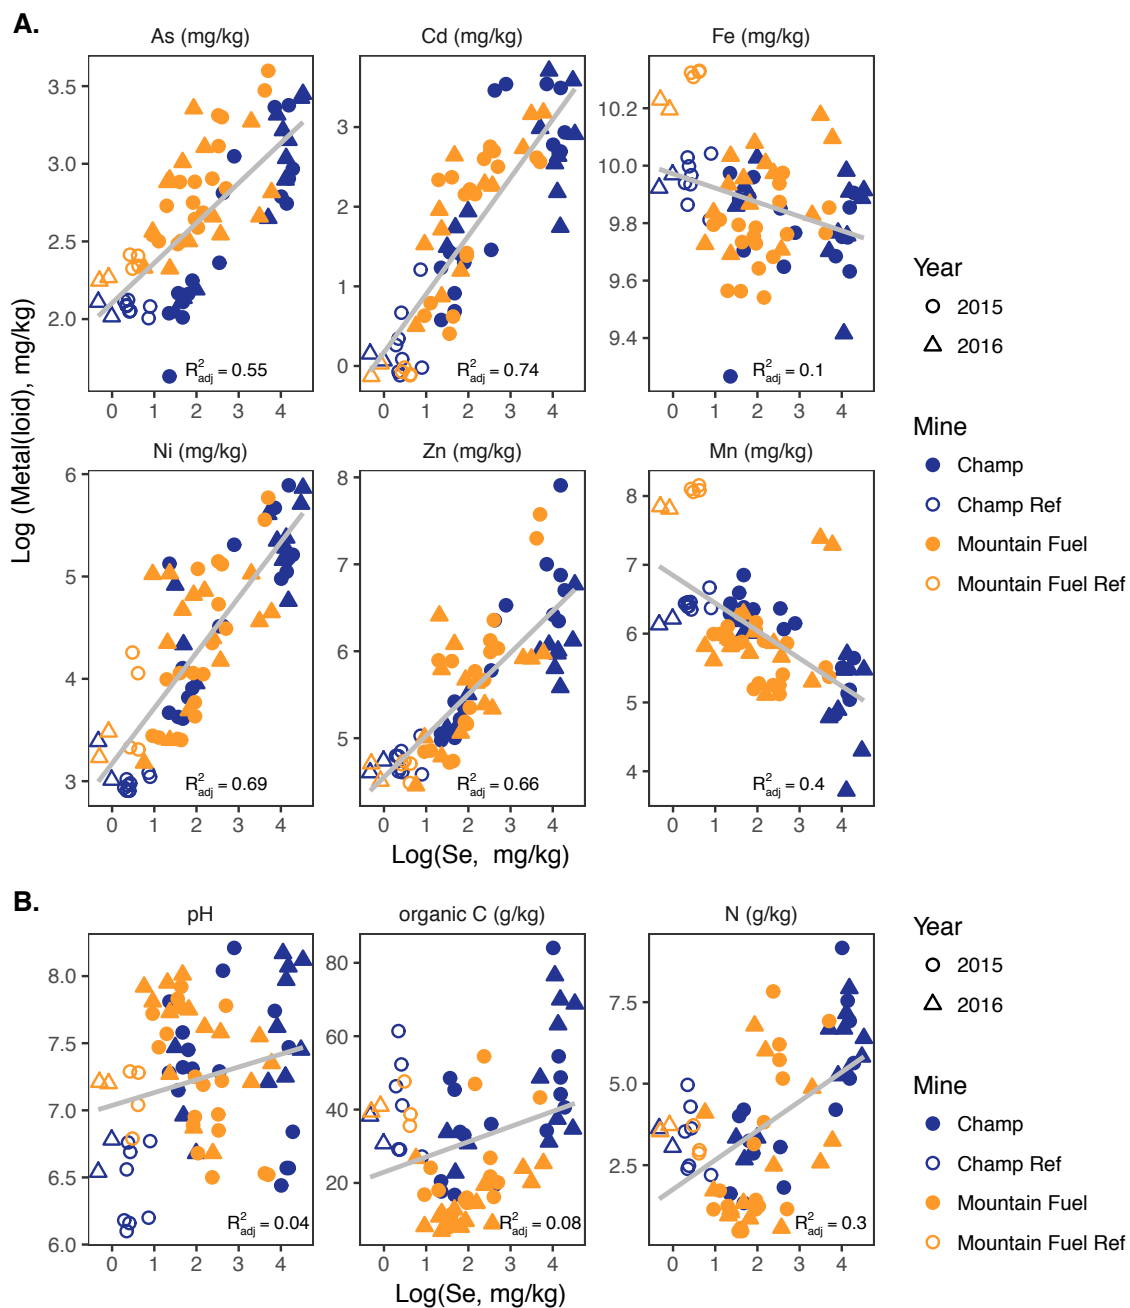

Fig S2: Correlations of log-transformed Se concentration with log-transformed geochemical constituents (As, Cd, Fe, Ni, Zn, and Mn) (A) and pH, organic C, and total N (B) in soils in the Champ Mine (dark blue, closed symbols), Champ Reference (dark blue, open symbols), Mountain Fuel Mine (orange, closed symbols), and Mountain Fuel Reference (orange, open symbols). All regressions were statistically significant ( $p < 0.05$ ), with adjusted  $R^2$  ( $R^2_{adj}$ ) values listed in the bottom of each panel. Each data point represents an individual sample taken in either 2015 (circles) or 2016 (triangles).

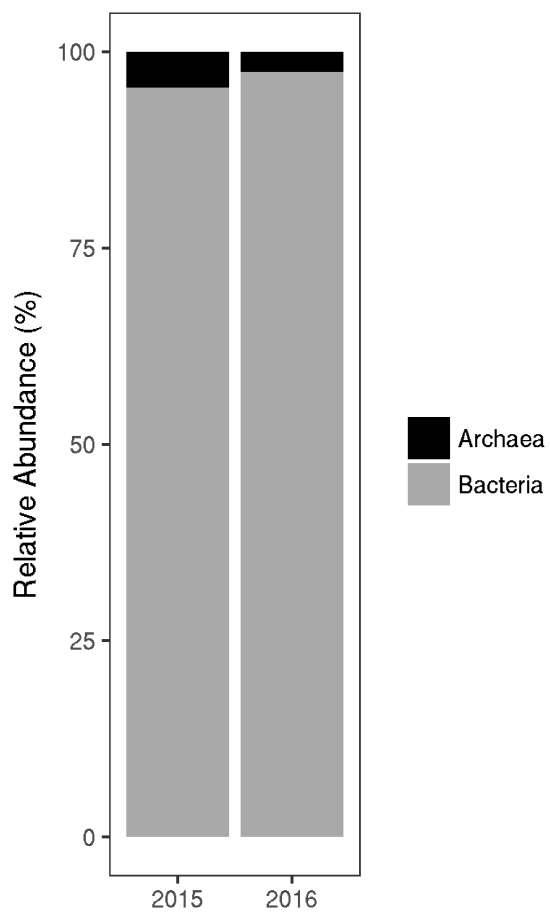

Fig S3: Relative abundance of archaeal (black bars) and bacterial sequences (grey bars) in soils during 2015 and 2016.



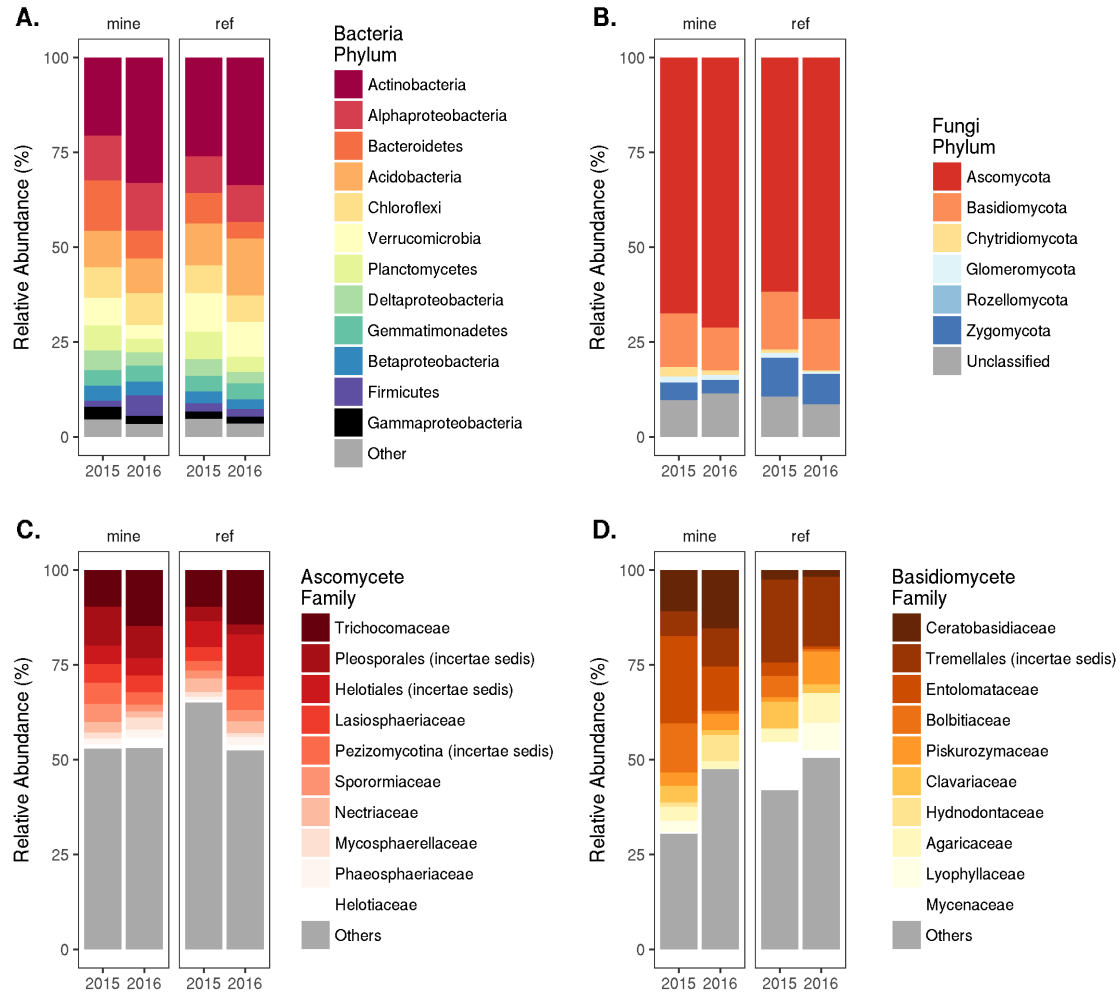

**Fig S4:** Taxonomic affiliation of bacterial (phylum level, A) and fungal sequences (phylum level, B, and family level, C & D) in mined and reference areas during 2015 and 2016.

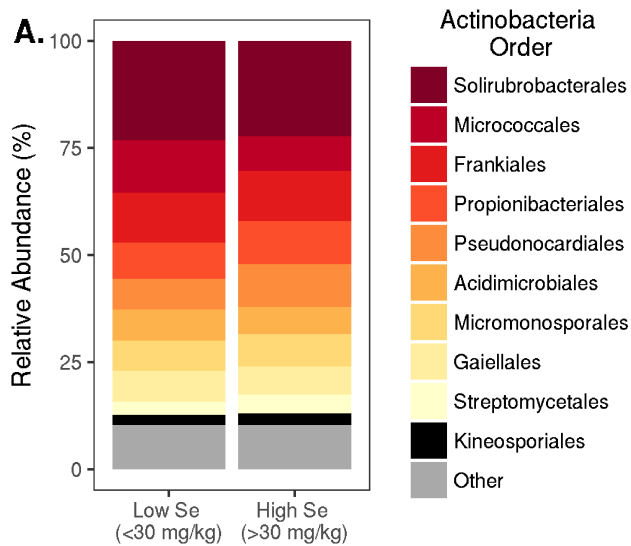

**Fig S5:** Top most abundant bacterial orders in high and low Se soils in Actinobacteria (A) and Gemmatimonadetes (B) phyla and Alphaproteobacteria (C) class.

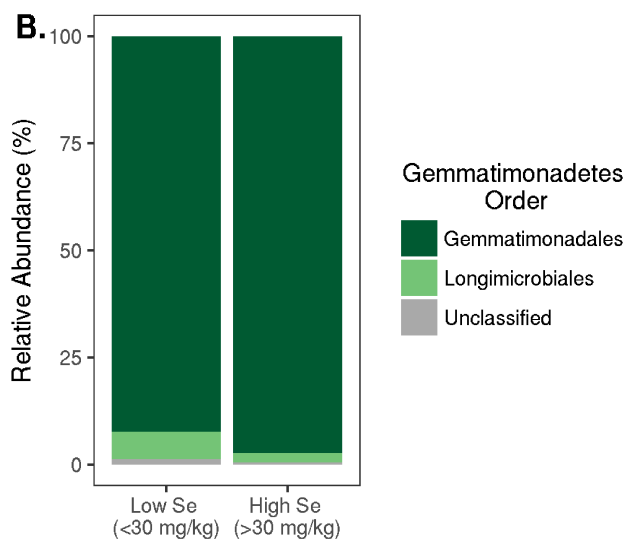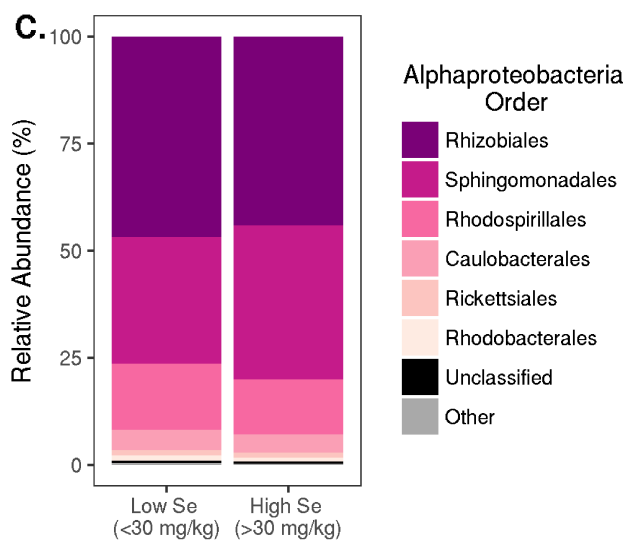

Supplement: AEM.01394-18_zam016188679s1.pdf [file AEM.01394-18_zam016188679s1.pdf]
